# Supplementary material for: Structure, luminescence and magnetic properties of an erbium(iii) β-diketonate homodinuclear complex
Source: Royal Society of Chemistry journal article supplement (doi:10.1039/c6nj01598k), 2016-01-01
Supplement: c6nj01598k1.pdf [file c6nj01598k1.pdf]

## SUPPLEMENTARY INFORMATION

### Structure, luminescence and magnetic properties of an erbium(III) $\beta$ -diketonate homodinuclear complex

P. Martín-Ramos,<sup>a,b</sup> L.C.J. Pereira,<sup>\*c</sup> J.T. Coutinho,<sup>c</sup> F. Koprowiak,<sup>d</sup> H. Bolvin,<sup>d</sup> V. Lavín,<sup>e</sup> I.R. Martín,<sup>e</sup> J. Martín-Gil<sup>f</sup> and M. Ramos-Silva<sup>\*b</sup>

<sup>a</sup> EPSH, Universidad de Zaragoza, Carretera de Cuarte s/n, 22071, Huesca, Spain.

<sup>b</sup> CFisUC, Department of Physics, Universidade de Coimbra, Rua Larga, P-3004-516 Coimbra, Portugal.

<sup>c</sup> C2TN, DECNentro de Ciências e Tecnologias Nucleares, Instituto Superior Técnico, Universidade de Lisboa, 2695-066 Bobadela LRS, Portugal.

<sup>d</sup> Laboratoire de Chimie et Physique Quantiques, Université Toulouse III, 118 route de Narbonne, 31062 Toulouse, France.

<sup>e</sup> Departamento de Física and MALTA Consolider Team, Universidad de La Laguna, E-38206 San Cristóbal de La Laguna, Santa Cruz de Tenerife, Spain.

<sup>f</sup> Advanced Materials Laboratory, ETSIIAA, Universidad de Valladolid, Avenida de Madrid 44, 34004, Palencia, Spain.

\* Corresponding authors: [manuela@pollux.fis.uc.pt](mailto:manuela@pollux.fis.uc.pt), [lpereira@ctn.ist.utl.pt](mailto:lpereira@ctn.ist.utl.pt)

#### Contents:

1. Structural data
2. X-ray powder diffraction
3. Thermal analysis
4. Vibrational characterization
5. Optical characterization
6. Magnetic measurements
7. Theoretical Calculations

#### 1. Structural data

**Table S1.** Selected distances and angles (Å,°)

| Bond      | Distance | Bonds     | Angle     |
|-----------|----------|-----------|-----------|
| Er1-O1    | 2.305(2) | O2-Er1-O1 | 73.42(7)  |
| Er1-O2    | 2.292(2) | O3-Er1-O4 | 74.70(7)  |
| Er1-O3    | 2.283(2) | O5-Er1-O6 | 74.62(7)  |
| Er1-O4    | 2.286(2) | O3-Er1-O1 | 118.01(6) |
| Er1-O5    | 2.290(3) | O4-Er1-O1 | 79.09(6)  |
| Er1-O6    | 2.300(2) | O5-Er1-O1 | 78.44(7)  |
| Er1-N1    | 2.580(2) | O6-Er1-O1 | 149.29(8) |
| Er1-N2    | 2.583(3) | O1-Er1-N1 | 135.55(6) |
| Er-O avg. | 2.293    | O2-Er1-N2 | 70.84(7)  |
| Er-N avg. | 2.582    | N1-Er1-N2 | 62.63(6)  |

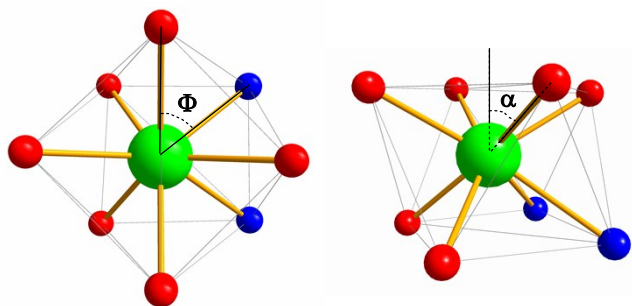

**Figure S1.** Definition of  $\Phi$  and  $\alpha$  in the square-antiprismatic geometry, taking the first coordination sphere of Er1 as an example.

## 2. X-ray powder diffraction

The experimental diffractograms in Figure S2 show a background higher for low theta angles as expected from the diffuse scattering of X-rays by glass and air, a common characteristic when using rotating capillaries in a Debye-Scherrer geometry. Powder diffraction shows that all the material synthesized contains the same structure as the small single crystals used for single-crystal X-ray diffraction.

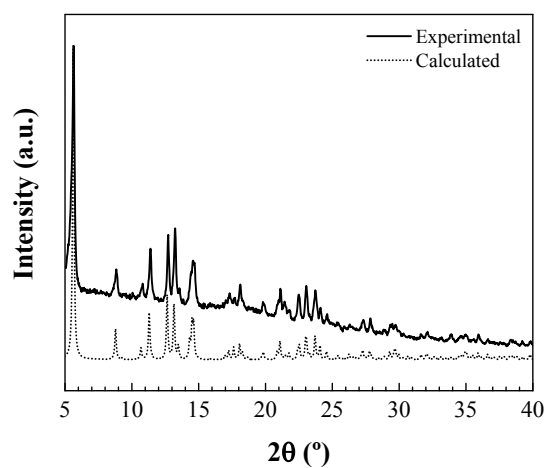

**Figure S2.** Experimental (*solid line*) vs. simulated (*dotted line*) X-ray powder diffraction patterns for the complex.

### 3. Thermal analysis

The DSC curve of  $[\text{Er}_2(\text{nd})_6(\mu\text{-bpm})]$  complex is depicted in Figure S3.

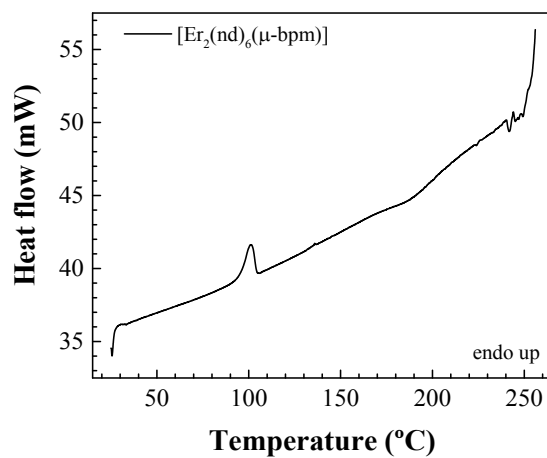

Figure S3. DSC curve of  $[\text{Er}_2(\text{nd})_6(\mu\text{-bpm})]$  complex.

### 4. Vibrational characterization

The ATR-FTIR spectrum of  $[\text{Er}_2(\text{nd})_6(\text{bpm})]$  is shown in Figure S4.

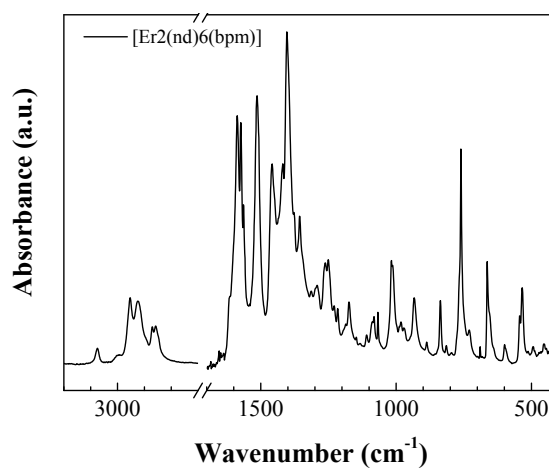

Figure S4. ATR-FTIR spectrum of  $[\text{Er}_2(\text{nd})_6(\mu\text{-bpm})]$ .

## 5. Optical characterization

### Photoluminescence in the visible range

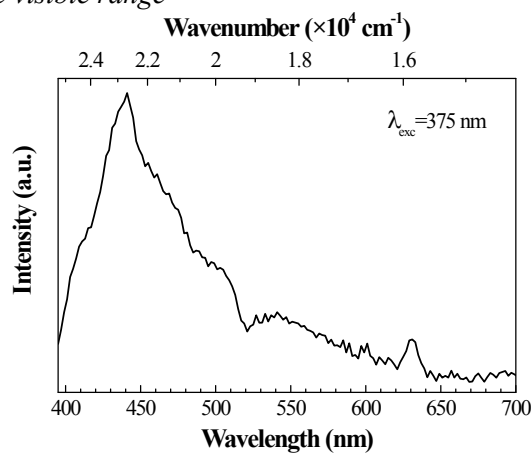

**Figure S5.** Photoluminescence spectrum in the visible region for  $[\text{Er}_2(\text{nd})_6(\mu\text{-bpm})]$  upon excitation at 375 nm.

### NIR photoluminescence spectrum

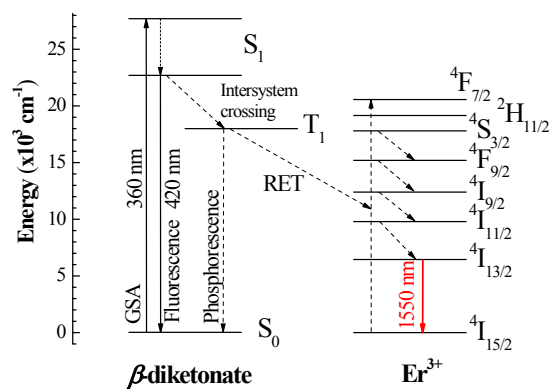

**Figure S6.** Scheme of the energy transfer mechanisms and emission processes.

## 6. Magnetic measurements

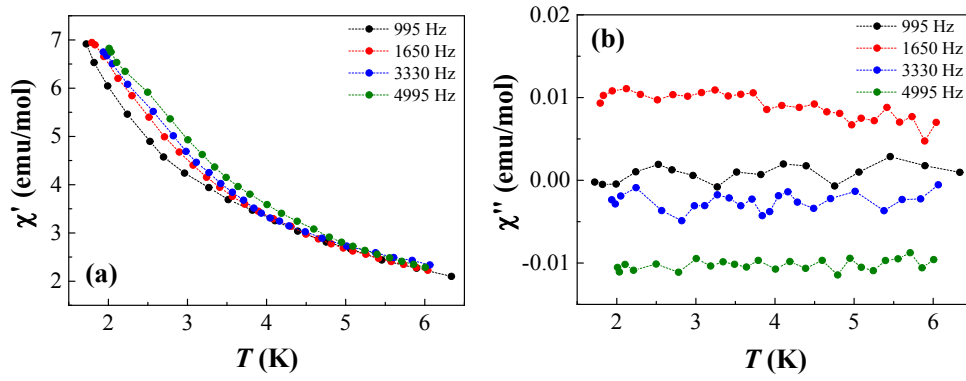

**Figure S7.** (a) In-phase and (b) out-of-phase components of the AC susceptibility at different frequencies in the 1.7–6.5 K temperature range for the  $[\text{Er}_2(\text{nd})_6(\mu\text{-bpm})]$  complex.  $H_{\text{AC}}=5$  Oe;  $H_{\text{DC}}=0$  Oe.

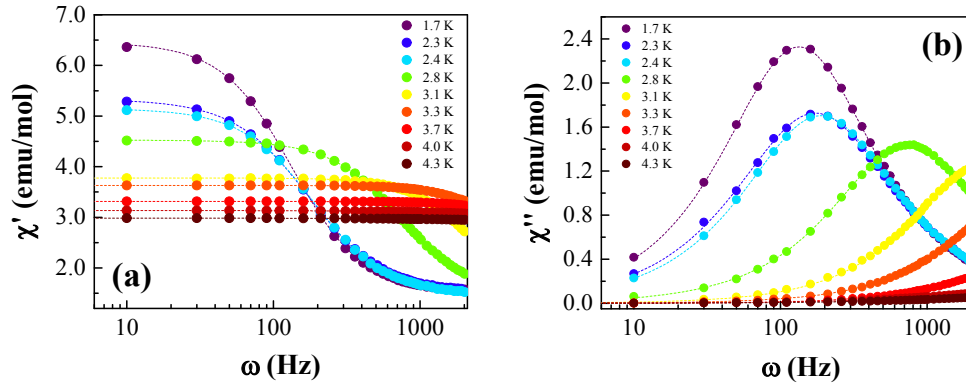

**Figure S8.** (a) In-phase, and (b) out-of-phase components of the AC susceptibility at different frequencies in the 1.7–4.3 K temperature range for the  $[\text{Er}_2(\text{nd})_6(\mu\text{-bpm})]$  complex. Debye fittings are shown as dashed lines.  $H_{\text{AC}}=5$  Oe;  $H_{\text{DC}}=1000$  Oe.

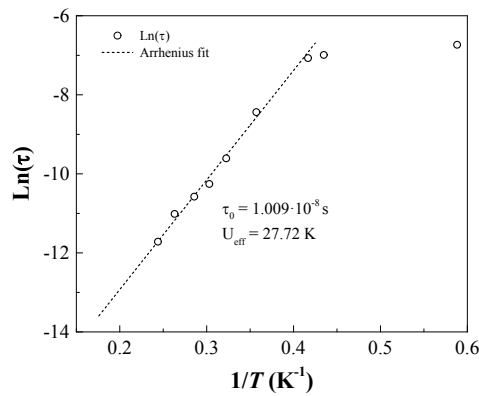

**Figure S9.** Arrhenius Law fitting for  $[\text{Er}_2(\text{nd})_6(\mu\text{-bpm})]$  complex.  $H_{\text{AC}}=5$  Oe,  $H_{\text{DC}}=1000$  Oe.

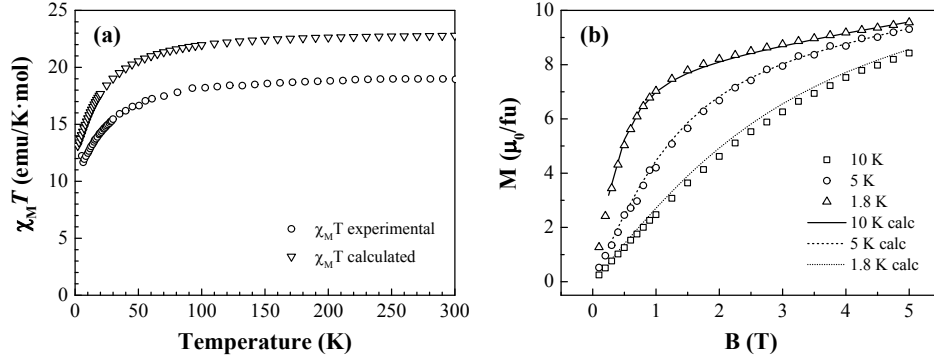

**Figure S10.** Experimental and calculated values for: (a) temperature dependence of the  $\chi T$  product; (b) magnetization vs. applied field.

## 7. Theoretical calculations

A local modification of MOLCAS was used to generate natural spin orbitals (NSOs) from SO-CASSCF calculations. Within the frame of the principal magnetic axes of the doublet ground state  $X$ ,  $Y$  and  $Z$ , to generate the NSOs  $\phi_p^u$  in direction  $u = X, Y, Z$ , one considers linear combinations of the ground state doublet components  $|\Psi_0^u\rangle$  diagonalizing the magnetic moment operator  $\hat{M}_u$  and the NSOs  $\phi_i^u$  are the eigen-functions of the one-particle spin-magnetization density matrices. It results that when the external magnetic field is applied along direction  $u$ , the spin density is

$$\rho^u(r) = \sum_{i=1}^7 n_i \phi_i(r)^2 \quad \text{where } \phi_i \text{ is the NSO } i \text{ with occupation } n_i. \text{ The spin magnetization in this direction is } \sum_{i=1}^7 n_i = 2 \langle \Psi_0^u | \hat{S}_u | \Psi_0^u \rangle = g_i^S / 2$$

**Table S2.** Overlap integrals of the NSOs along direction 3. The total overlap interaction is  $S_{AB} = 1.28 \cdot 10^{-8}$ .

| Overlap Integrals | NSO1B                  | NSO2B                  | NSO3B                  | NSO4B                  | NSO5B                  | NSO6B                  | NSO7B                  |
|-------------------|------------------------|------------------------|------------------------|------------------------|------------------------|------------------------|------------------------|
| NSO1A             | $1.25 \times 10^{-4}$  | $-5.25 \times 10^{-5}$ | $2.36 \times 10^{-5}$  | $-5.41 \times 10^{-5}$ | $-8.65 \times 10^{-5}$ | $-5.71 \times 10^{-5}$ | $4.75 \times 10^{-5}$  |
| NSO2A             | $-5.25 \times 10^{-5}$ | $2.23 \times 10^{-5}$  | $-2.14 \times 10^{-5}$ | $1.40 \times 10^{-5}$  | $1.56 \times 10^{-5}$  | $-2.15 \times 10^{-5}$ | $-1.62 \times 10^{-5}$ |
| NSO3A             | $2.36 \times 10^{-5}$  | $-2.14 \times 10^{-5}$ | $-5.58 \times 10^{-7}$ | $-1.84 \times 10^{-5}$ | $-2.05 \times 10^{-5}$ | $-1.72 \times 10^{-5}$ | $2.12 \times 10^{-5}$  |
| NSO4A             | $-5.41 \times 10^{-5}$ | $1.40 \times 10^{-5}$  | $-1.84 \times 10^{-5}$ | $1.91 \times 10^{-5}$  | $2.12 \times 10^{-5}$  | $2.57 \times 10^{-6}$  | $-2.79 \times 10^{-5}$ |
| NSO5A             | $-8.65 \times 10^{-5}$ | $1.56 \times 10^{-5}$  | $-2.05 \times 10^{-5}$ | $2.12 \times 10^{-5}$  | $4.24 \times 10^{-5}$  | $1.26 \times 10^{-5}$  | $-7.00 \times 10^{-6}$ |
| NSO6A             | $-5.71 \times 10^{-5}$ | $-2.15 \times 10^{-5}$ | $-1.72 \times 10^{-5}$ | $2.57 \times 10^{-6}$  | $1.26 \times 10^{-5}$  | $-4.75 \times 10^{-5}$ | $-5.98 \times 10^{-6}$ |
| NSO7A             | $4.75 \times 10^{-5}$  | $-1.62 \times 10^{-5}$ | $2.12 \times 10^{-5}$  | $-2.79 \times 10^{-5}$ | $-7.00 \times 10^{-6}$ | $-5.98 \times 10^{-6}$ | $6.64 \times 10^{-5}$  |
| Occupation        | 0.599                  | 0.557                  | 0.461                  | 0.38                   | 0.222                  | 0.141                  | 0.007                  |

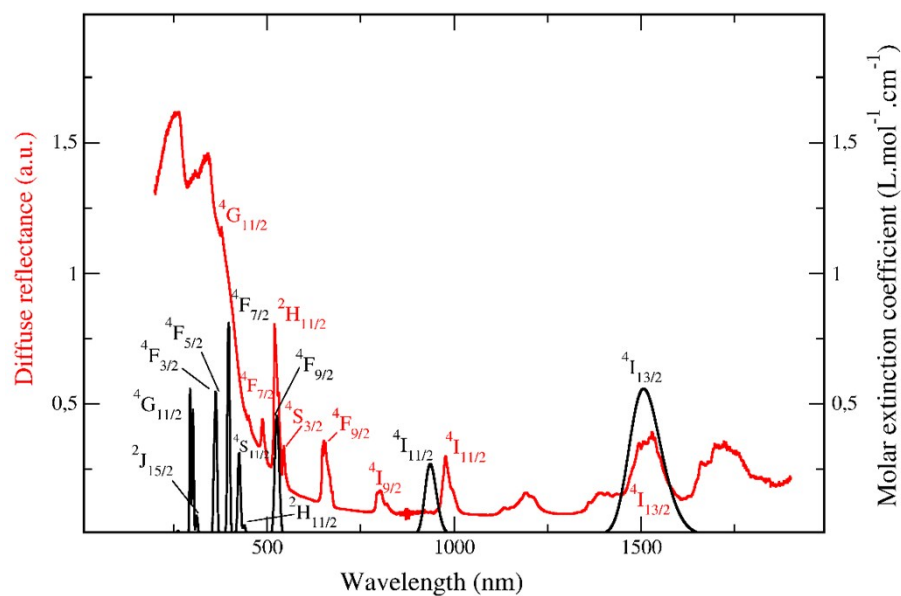

**Figure S11.** Calculated UV-visible spectrum at SO-CASSCF level (*black*) and experimental UV-Vis diffuse reflectance spectrum (*red*).
